Development 133, 3051 (2006) doi:10.1242/dev.02518

## BDNF increases synapse density in dendrites of developing tectal neurons in vivo

**Analiza L. Sanchez, Benjamin J. Matthews, Margarita M. Meynard, Bing Hu, Sana Javed and Susana Cohen-Cory** *Development* **133**, 2477-2486.

An error in the last name of one of the authors was not corrected before this article went to press.

Susana Cohen Cory should have been written as Susana Cohen-Cory.

We apologise to the authors and readers for this mistake.
